# Supplementary material for: The REGγ inhibitor NIP30 increases sensitivity to chemotherapy in p53-deficient tumor cells
Source: PubMed Central journal article supplement (PMC7413384; doi:10.1038/s41467-020-17667-7), 2020-08-06
Supplement: 41467_2020_17667_MOESM1_ESM.pdf [file 41467_2020_17667_MOESM1_ESM.pdf]

1 **Supplementary Information**

2

3 **The REG $\gamma$  inhibitor NIP30 increases sensitivity to chemotherapy**  
4 **in p53-deficient tumor cells**

5

6 **Gao et al .**

7

8

9

10 **Supplementary Figure Legends**

Supplementary Figure 1

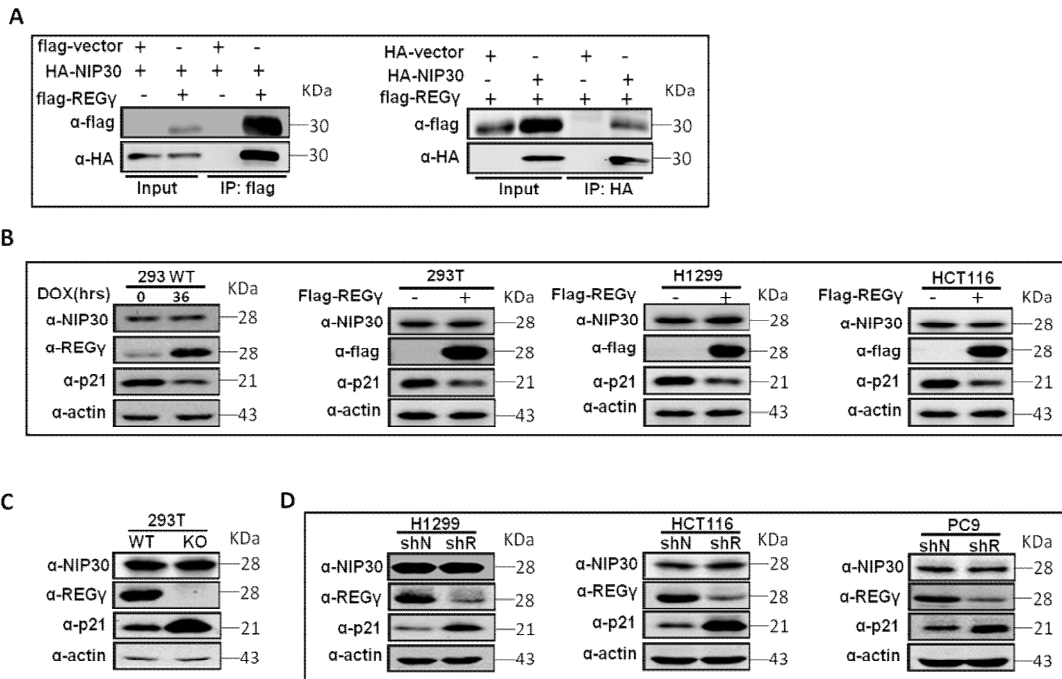

11

12 **Supplementary Figure 1. NIP30 is not a substrate of REGy.** (A) Reciprocal  
 13 interactions between REGy and NIP30 in 293T cells were determined by  
 14 exogenous co-immunoprecipitation and Western blot analysis in three  
 15 independent experiments. Data represent mean  $\pm$  SEM. (B) 293 REGy-WT  
 16 (active REGy) cells were induced by doxycycline (DOX, 1  $\mu$ g mL<sup>-1</sup>) for 36 hrs;  
 17 293T, H1299 and HCT116 cells were transfected with flag-REGy for 24hrs,  
 18 then the expression of NIP30, REGy and p21 was examined by Western  
 19 blotting in three independent experiments. Data represent mean  $\pm$  SEM. (C)  
 20 The protein level of NIP30 and p21 were tested in REGy WT and knock out  
 21 293T cells. Actin was used as a loading control. Data represent mean  $\pm$  SEM  
 22 from three independent experiments. (D) Stably expressing a control shRNA  
 23 (shN) or a REGy-specific shRNA (shR) was generated in H1299, HCT116 and  
 24 PC9 cells. The total cell lysates were analyzed by immunoblotting with  
 25 indicated antibodies (NIP30, Flag, p21 and actin). Data represent mean  $\pm$  SEM  
 26 from three independent experiments.

27

Supplementary Figure 2

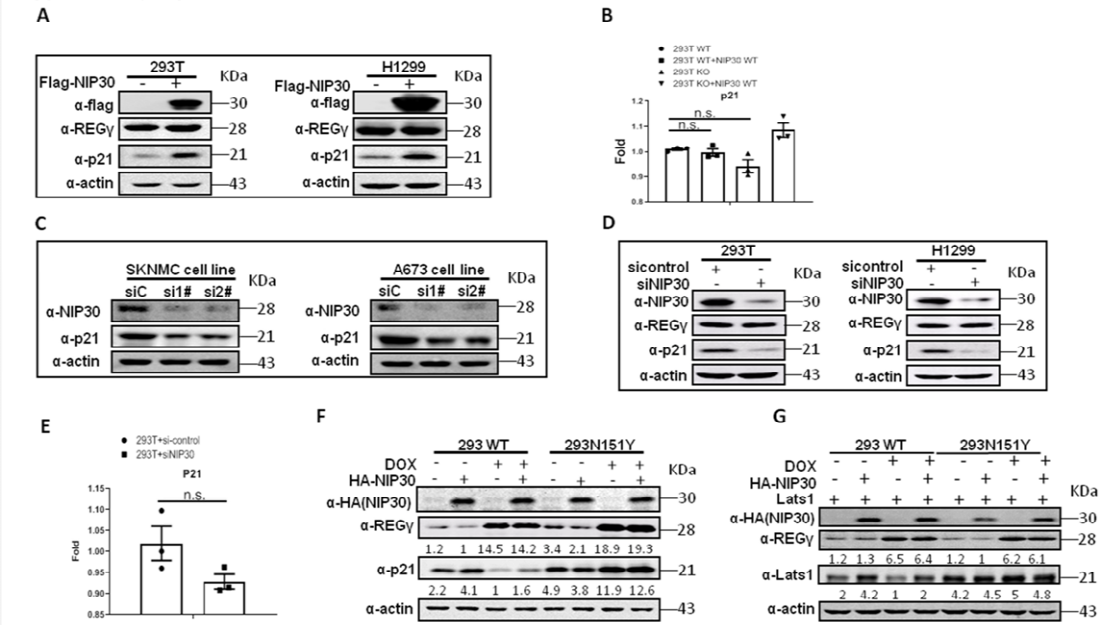

28

29 **Supplementary Figure 2. NIP30 prevents the turnover of p21 protein.** (A)

30 293T and H1299 cells were transfected with 2µg NIP30 plasmid. Cell lysates

31 were subjected to Western blot analysis using flag, REGγ, p21 and actin in

32 three independent experiments. Data represent mean ± SEM. (B) 293T

33 (REGγ-WT) and REGγ-KO cells were transfected with flag-NIP30 plasmid for

34 24hrs. The RT-PCR assay was performed to analyze the expression of p21

35 PCR; n=3, each group. Data represent means ± SEM. n.s.=no significance

36 (one-way Anova). (C) SKNMC and A673 cells were transiently transfected with

37 NIP30-siRNA or control-siRNA for 72 hrs. The protein level of NIP30 and p21

38 was checked by Western blot in three independent experiments. Data

39 represent mean ± SEM. (D) 293T and H1299 cells were transiently transfected

40 with NIP30-siRNA or control-siRNA for 72 hrs. Cell lysates were subjected to

41 Western blot analysis using indicated antibodies in three independent

42 experiments. Data represent mean ± SEM. (E) The mRNA expression of p21

43 was detected in 293T cells transfected NIP30-siRNA or control-siRNA by

44 RT-PCR; n=3, each group. Data represent means ± SEM. n.s.=no significance

45 (two tail t-test). (F) 293 REGγ-WT (active REGγ) and 293 REGγ-N151Y

46 (inactive REGγ) cells were induced by doxycycline (DOX, 1µg mL<sup>-1</sup>) for 36 hrs,

47 and then transfected 1ug HA-p21, 1ug HA-vector or HA-NIP30 followed by

48 Western Blot analysis. Data represent mean  $\pm$  SEM from three independent  
 49 experiments. (G) 293 REG $\gamma$ -WT (active REG $\gamma$ ) and 293 REG $\gamma$ -N151Y  
 50 (inactive REG $\gamma$ ) cells were induced by doxycycline (DOX, 1 $\mu$ g mL<sup>-1</sup>) for 36 hrs,  
 51 and then transfected 1ug HA-Lats1, 1ug HA-vector or HA-NIP30 followed by  
 52 Western Blot analysis. Data represent mean  $\pm$  SEM from three independent  
 53 experiments.

Supplementary Figure 3

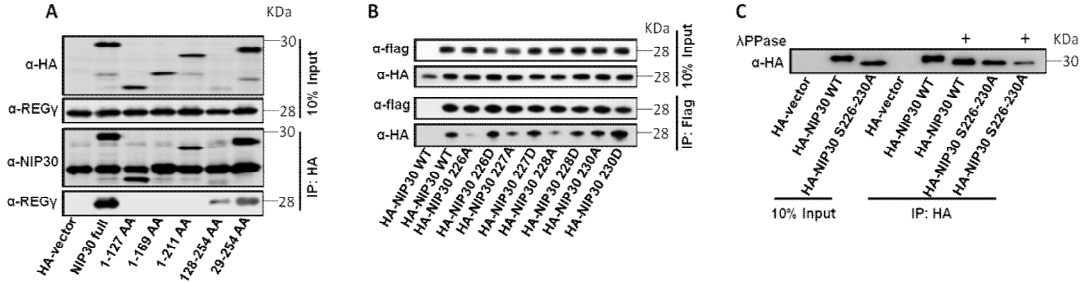

54

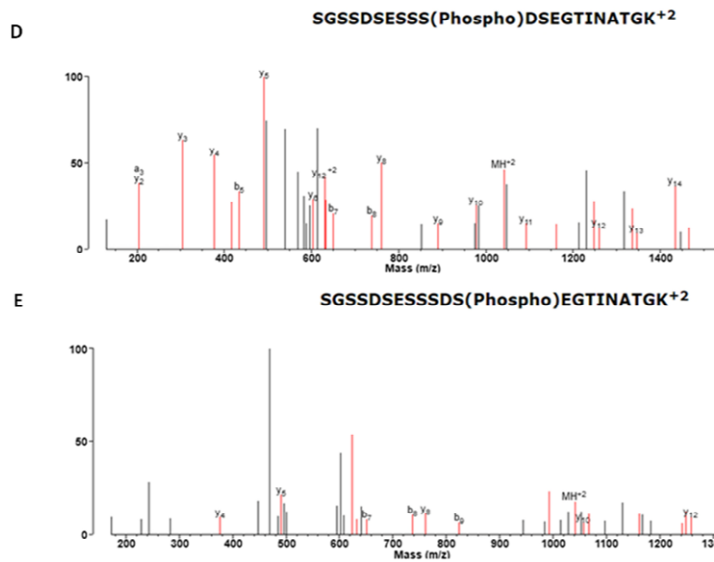

55

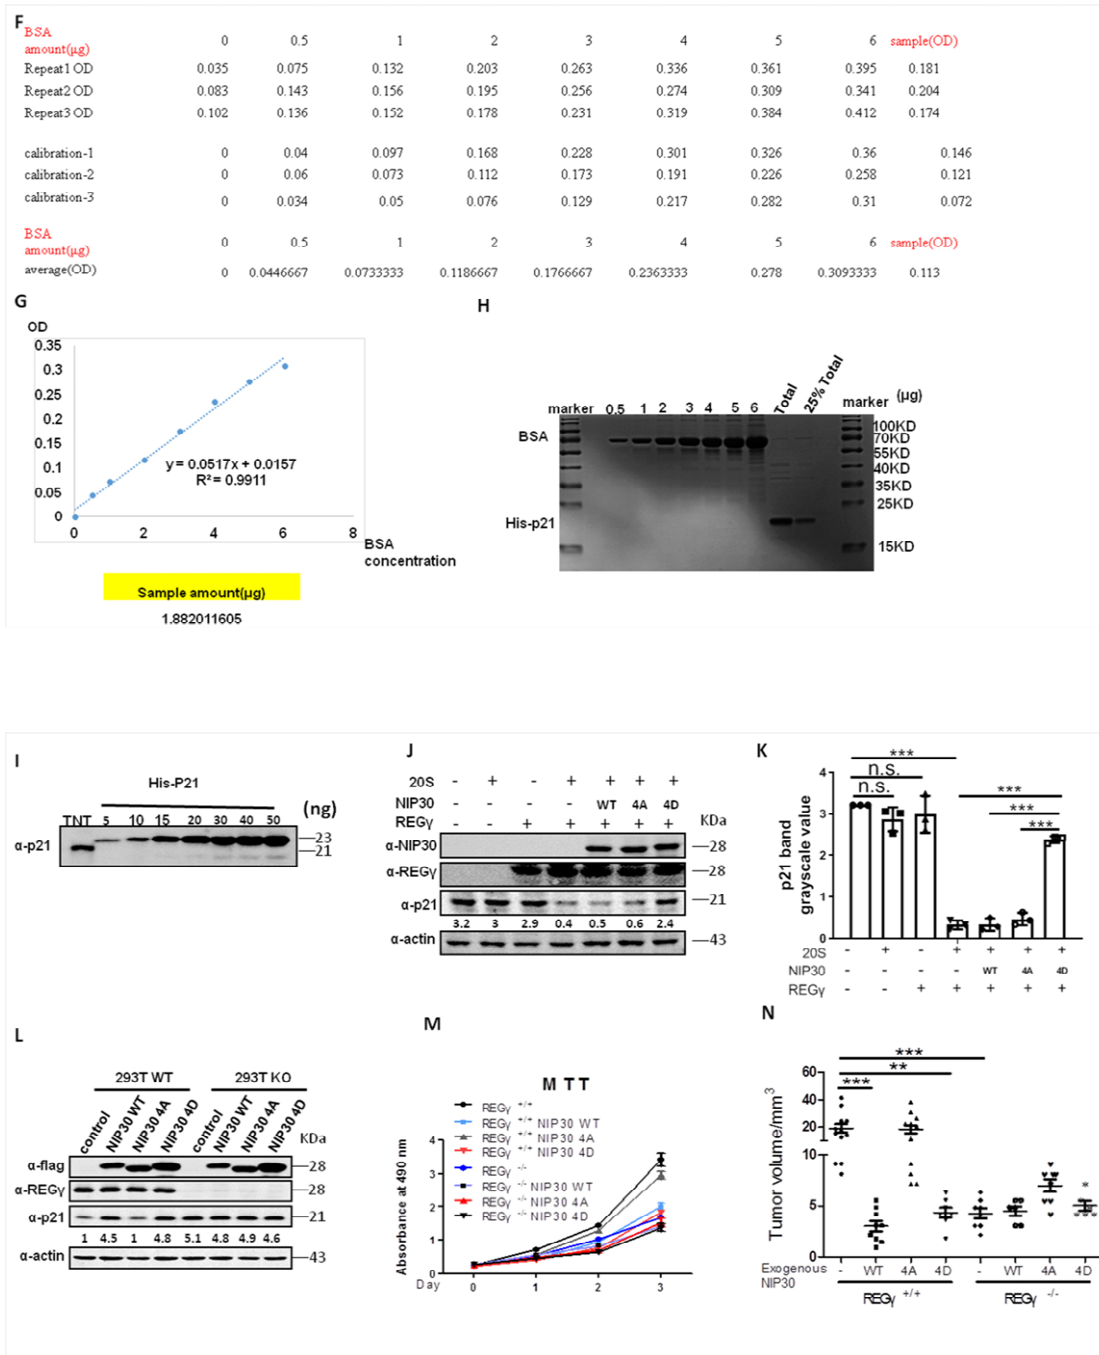

56

57

58

59 **Supplementary Figure 3. Phosphorylation of NIP30 at specific sites is**  
 60 **required for its regulation of REGy pathway.** (A) NIP30 fragments 1-127,  
 61 1-169, 1-211, 128-254, 29-254 were constructed in PSG5-HA tag vector and  
 62 co-transfected with PSG5-HA vector (HA-empty), NIP30 full length and  
 63 flag-REGy in 293T cells for 48hrs. HA beads were used for  
 64 immunoprecipitation assay. (B) 293T cells were transfected with 2 $\mu$ g  
 65 HA-vector or HA-NIP30 WT or HA-NIP30 4A for 36hrs. HA beads were used  
 66 for immunoprecipitation assay, then treated with  $\lambda$ PP or dd water. Cell lysates

67 were analyzed by immunoblotting with anti-HA antibody. Data in this figure are  
68 representatives of three independent repeats. (C) 293T cells were transfected  
69 with flag-tagged REG $\gamma$  and HA-tagged NIP30 wildtype (WT) or single point  
70 mutation of NIP30 S226A, NIP30 S226D, NIP30 S227A, NIP30 S227D, NIP30  
71 S228A, NIP30 S228D, NIP30 S230A, NIP30 S230D plasmids. Cell lysates  
72 were immunoprecipitated with anti-Flag beads and probed with anti-HA and  
73 anti-flag antibodies. (D, E) Stable 293 cell lines expressing HBTH-hNIP30  
74 pellets were collected and incubated with streptavidin beads. And then the  
75 conjugated protein complexes in beads were digested and identified by LC  
76 MS/MS analysis. (F-H) The His-p21 protein concentration purified by *E. coli*  
77 was measured as 1.88  $\mu\text{g}/\mu\text{l}$  based on a standard curve with commercially  
78 available BSA (0.5  $\mu\text{g}/\mu\text{l}$ , 1  $\mu\text{g}/\mu\text{l}$ , 2  $\mu\text{g}/\mu\text{l}$ , 3  $\mu\text{g}/\mu\text{l}$ , 4  $\mu\text{g}/\mu\text{l}$ , 5  $\mu\text{g}/\mu\text{l}$ , 6  $\mu\text{g}/\mu\text{l}$ )  
79 using a BCA kit for the absorbance at 562 nm. A Coomassie brilliant blue  
80 staining result was shown to demonstrate different concentrations of BSA  
81 standards and the purified His-p21 proteins. (I) Following application of 1  
82 microgram of p21 plasmid in a 50 microliter TNT system for *in vitro* translation,  
83 the amount of p21 in a 5 microliter TNT translation system was estimated as  
84 10~15 ng by Western blot analysis of 5 microliter of TNT mix along with 5ng,  
85 10ng, 15ng, 20ng, 30ng, 40ng, and 50ng His-p21. (J) Purified NIP30 WT,  
86 NIP30 4A, NIP30 4D, REG $\gamma$ , 20S proteasome and *in vitro* translated p21  
87 proteins were incubated at 30°C as described in Materials and Methods.  
88 Anti-actin immunoblot is shown as the loading controls. Grayscale values of  
89 p21 were measured by Image J. The numbers below p21 bands represent  
90 values normalized against loading controls (actin) relative to the grayscale  
91 value in lane 1 which is set as a reference for the rest of bands. (K) The  
92 quantitated p21 values in J were statistically analyzed along with additional two  
93 repeating degradation experiments (see Source Data P 41/42). To ensure  
94 reliable comparison, the grayscale values of the first p21 bands in the  
95 repeating experiments were arbitrarily set to 3.2 (same as in J) followed by  
96 normalization of relative p21 levels for the rest of lanes. Values in each bar are

97 presented as the means  $\pm$  SEM. **\*\*\***,  $p < 0.001$ . n.s.=no significance (one-way  
 98 Anova).  $P$  (lane1, lane4) =  $9.6E-7$ ,  $P$  (lane4, lane7) =  $1.4E-4$ ,  $P$  (lane5, lane7)  
 99 =  $1.9E-4$ ,  $P$  (lane6, lane7) =  $3.3E-4$ . (L) REG $\gamma$  WT and knock out 293T cells  
 100 were infected with plvx-EF1 $\alpha$ -ires-puro-flag-NIP30 (WT, 4A, 4D) to construct  
 101 stable cells. Cell lysates were collected and flag, REG $\gamma$ , p21 and actin were  
 102 analyzed by Western blotting. (M) The same quantity of 293T cells as were  
 103 seeded, cell proliferation was analyzed by MTT assay. Data represented mean  
 104 + SEM (n=4) (N) Xenograft Tumors were dissected and volumes were  
 105 measured; n=12, REG $\gamma$ +/+ group; n=9, REG $\gamma$ +/+NIP30 WT group; n=12,  
 106 REG $\gamma$ +/+NIP30 4A group; n=8, REG $\gamma$ +/+NIP30 4D group; n=8, REG $\gamma$ -/- group;  
 107 n=6, REG $\gamma$ -/-NIP30 WT group; n=8, REG $\gamma$ -/-NIP30 4A group; n=6,  
 108 REG $\gamma$ -/-NIP30 4D group. Values are presented as the means  $\pm$  SEM. \*,  $p < 0.05$ ;  
 109 \*\*,  $p < 0.01$  (one-way Anova).  $P$ (lane1, lane2) =  $3.4E-4$ ,  $P$ (lane1, lane4) = 0.002,  
 110  $P$ (lane1, lane4) =  $9.7E-4$ .

#### Supplementary Figure 4

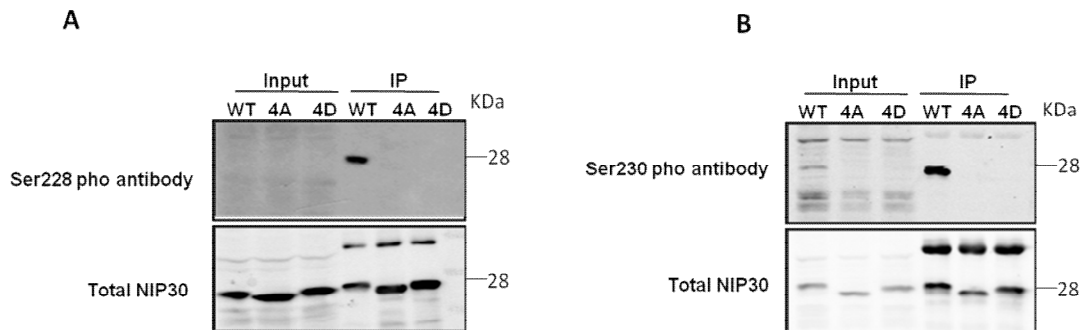

113 **Supplementary Figure 4. Validation of the specificity of antibodies for**  
 114 **pNIP30-Ser228 and pNIP30-Ser230.** (A) 293T cells were transfected with  
 115 HA-NIP30 WT, HA-NIP30 4A, HA-NIP30 4D for 48 hrs, and then HA beads  
 116 were used to pull down the protein by anti-HA. pNIP30-Ser228 and total NIP30  
 117 antibody were used in Western blot. (B) 293T cells were transfected with  
 118 HA-NIP30 WT, HA-NIP30 4A, HA-NIP30 4D for 48 hrs, and then HA beads  
 119 were used to pull down the protein by HA-antibody. -pNIP30-Ser230 and total

120 NIP30 antibody were used in Western blot. All data in this figure are  
 121 representatives of three independent repeats.

122

123

124

125

126

127

Supplementary Figure 5

**A**

| position | code | kinase | peptide         | score |
|----------|------|--------|-----------------|-------|
| 226      | S    | CK2    | SGSSDSESSSDSEGT | 7.962 |
| 227      | S    | CK2    | GSSDSESSSDSEGTI | 5.604 |
| 228      | S    | CK2    | SSDSESSSDSEGTIN | 6.5   |
| 230      | S    | CK2    | DSESSSDSEGTINAT | 3.398 |

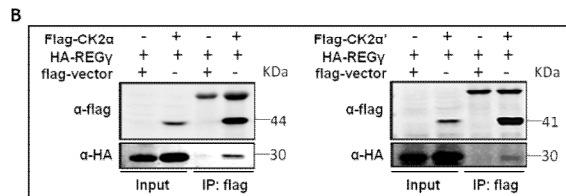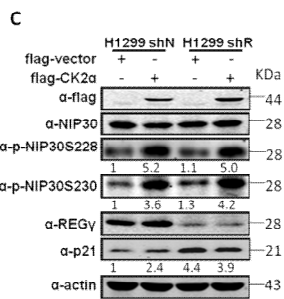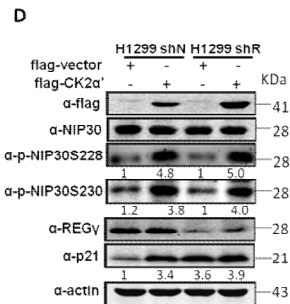

128



E

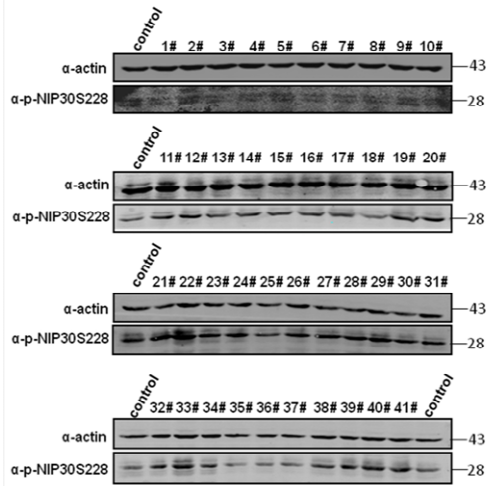

F

```

1 ggTgaactat agaatagggc cctctagatg catgctcgag tcagagcttc ttacagacgac
61 tftacatctc cctctgtctc ttctcccctg cccaggtccg gctcttggfg cggaaactct
121 tcaggtcttc ttaaagtc tctgtgtgca tgggcccgta gctagggggc tcacagtaag
181 actggcattt cataaagaac tcttgtatc cccccttcag gacatacagc tcagggtagt
241 ggagttggg gtattcatta cccaggggat ctctctctct cacatacggc cacatgcygg
301 gacctcttc agaagaaaac tgcagtgaa acacaacaat gacacgcttg ccatcagtag
361 gtcaatggg ctttcaat aagaagtctt caacctctc ttccatgtgc aagttcactg
421 caccctgat gtggctccc tctattcat atgggtatcg acagtcgatg ataacaact
481 cttaatgag gttggcaaac ttgccattca aaacagatgc cataattct ggagagatgt
541 atmtaact ctgatgttc ccagcaactg tatgaaagag ataacccttg gagaagtctc
601 ctataagtc ccttgggtca ttgccaaaa ttgttcaat gttcctttg ggaggagatg
661 ccagggataa agactgatga agagtctcat gggcctctc tggattagt gactcttgg
721 ggctggccc agactatgc ttctctctc ttgtacttc aggtggagac tctctttag
781 atgttctg tcttcaac actgaccgag tctgtgagct acacagggaa ggggagtcac
841 acagctgc atcgttgc aaggttga gttctatga cgagaggagc tgtccagagcc
901 ttccatgc acgaggggt ctctctca ttctcagat tcttccatc gagaaggtca
961 cgaagccat catctcacc agacaagtg gctgtcacag gtagctggg tgtaaaaagag
1021 gaatgaat tccttggtc actgctatc tttcattg aggaagcat ccgagctggg
1081 cagattct gcctctgtg gaagatct ttaccctct ggagtcctag agagtgcaggc
1141 agccacgag atacaggtct tactggctc taaactca aggtcatt ttcttgtct
1201 catctgggt cgatgagctg aaagatgca tggtcraag aatcagaatg gctccttca
1261 gagctggac tacatccca cagctctga ggtagggat gattctctc catagattt
1321 caaggttt tttactgtc caatggcca ggagaacta gacagaacc tgaatctgtg
1381 actggagg agccattct ctgcagata ctgttctc taacctcag tggttctc
1441 aatcactg ccagaccctg cagctgttc atgtgacg tcaggttgg gacaggcgaca
1501 gtcccccg cggctgaag gccaaatag gcctcaca cggctgcga cggggaggg
1561 ggctcagg cgaagagcag gcggcggcg tgcggggct cgggcccag ttccatggtg
1621 cggatcct tgtatcacc gtcctttag tctccatg taagcttgg tctccatag
1681 tgagtcgta ttaattcga taagccagta agcagtggt tctctagta gccagagagct
1741 ctgct

```

G

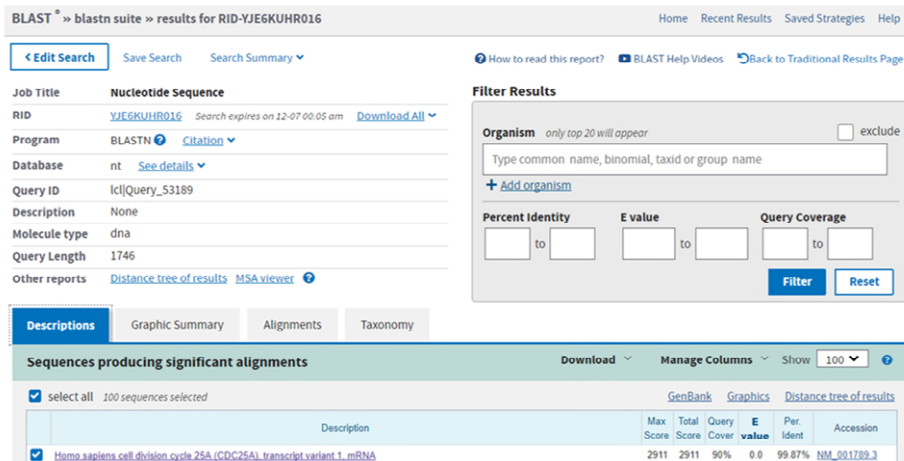

130

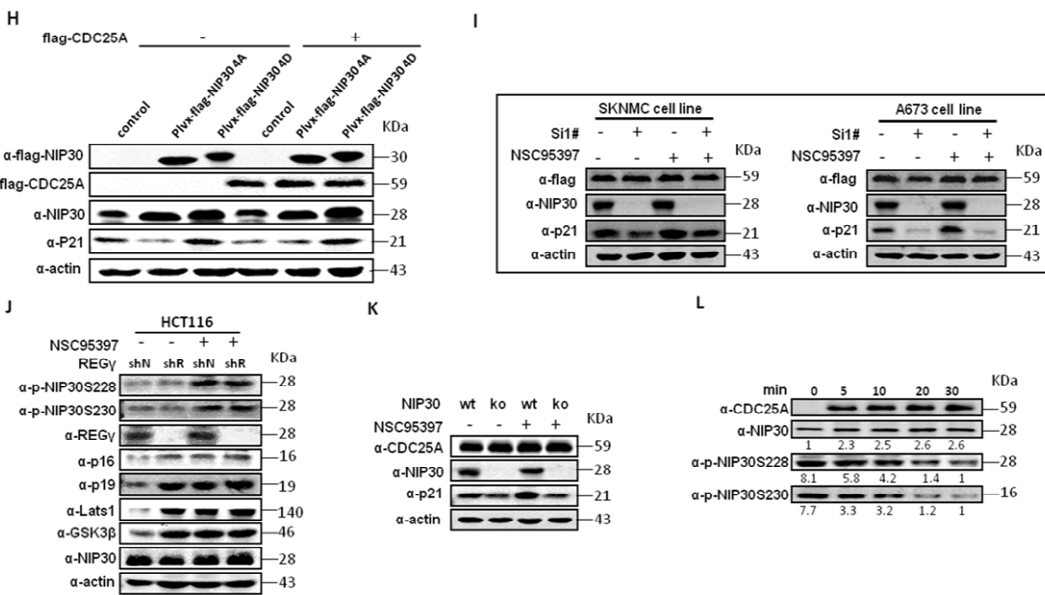

131

132 **Supplementary Figure 5. CK2 is an upstream kinase of NIP30. (A)**

133 **Prediction of the upstream kinase using GPS2.1. (B)** Reciprocal

134 interactions between CK2 and NIP30 in 293T cells were determined by

135 exogenous co-immunoprecipitation and Western blot analysis. Data represent

136 mean  $\pm$  SEM from three independent experiments. (C) Overexpressed

137 Flag-CK2 $\alpha$  in H1299 cells. Cell lysates were subjected to Western blot analysis

138 using flag, REGy, total NIP30, pNIP30Ser228, pNIP30Ser230, p21 and actin.

139 Data represent mean  $\pm$  SEM from three independent experiments. (D)

140 Overexpressed Flag-CK2 $\alpha$ ' in H1299 cells. Cell lysates were subjected to

141 Western blot analysis using flag, REGγ, total NIP30, pNIP30Ser228,  
142 pNIP30Ser230, p21 and actin. Data represent mean ± SEM from three  
143 independent experiments. (E) In 293T cells, 2ug candidate phosphatase  
144 plasmids (indicated by numbers for double-blinded screening) or  
145 pcDNA3.0-vector (control) were transiently transfected for 36hrs and then the  
146 expression of p-NIP30S228 was examined by Western blotting. Data  
147 represent mean ± SEM from three independent experiments. (F) The  
148 sequencing results of the selected candidate. (G) Sequencing results were  
149 obtained through NCBI database. (H) 293T WT and stable overexpression of  
150 NIP30 4A/ 4D cells were transfection with flag-CDC25A. Flag-CDC25A, p21  
151 and actin were analyzed by Western blotting in three independent experiments.  
152 Data represent mean ± SEM. (I) NIP30 was knocked down in SKNMC and  
153 A673 cells after treatment with NSC95397 for 3 hrs. Cell lysates were  
154 subjected to Western blot analysis. Data represent mean ± SEM from three  
155 independent experiments. (J) HCT116 (shN) and shR cells were treated with  
156 NSC95397 for 6 hrs. Cell lysates were subjected to Western blot analysis.  
157 Data represent mean ± SEM from three independent experiments. (K) Primary  
158 MEF cells were isolated from NIP30 Wild type and knock out mice and then  
159 NSC95397 was treated in cells for 6 hrs. The cell lysates were collected and  
160 the protein level of CDC25A, actin, p21 and NIP30 were analyzed by Western  
161 blotting in three independent experiments. Data represent mean ± SEM. (L)  
162 Flag-NIP30 and flag-CDC25A were individually expressed in 293T cells. Cell  
163 lysates were immunoprecipitated with anti-flag M2 agarose beads. The purified  
164 NIP30 was incubated with or without CDC25A for 5, 10, 20, or 30 minutes. The  
165 reaction products were separated by SDS-PAGE and analyzed by Western  
166 blot. Data represent mean ± SEM from three independent experiments.

167

Supplementary Figure 6

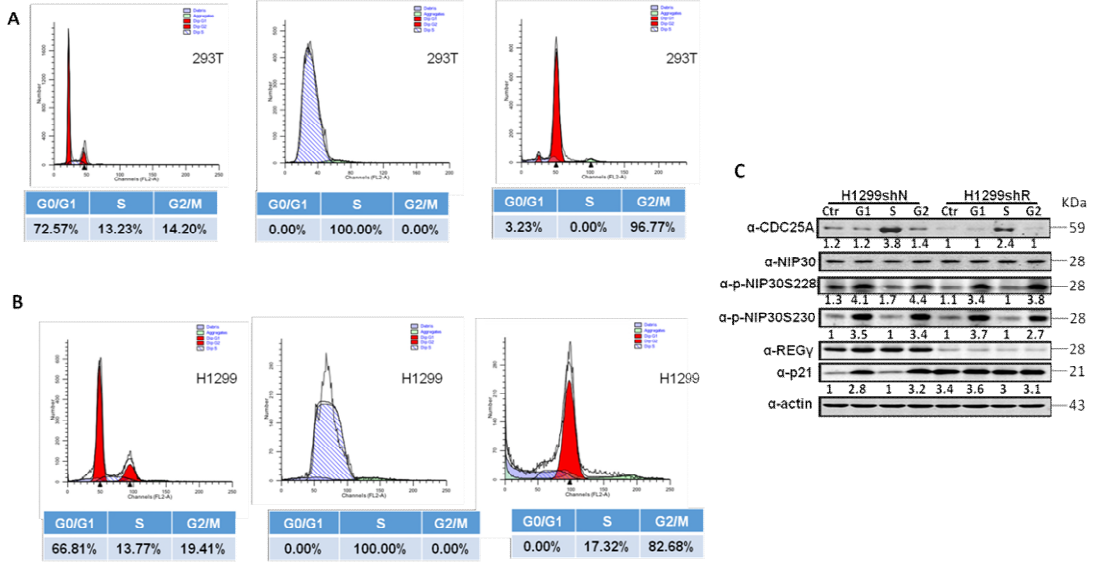

168

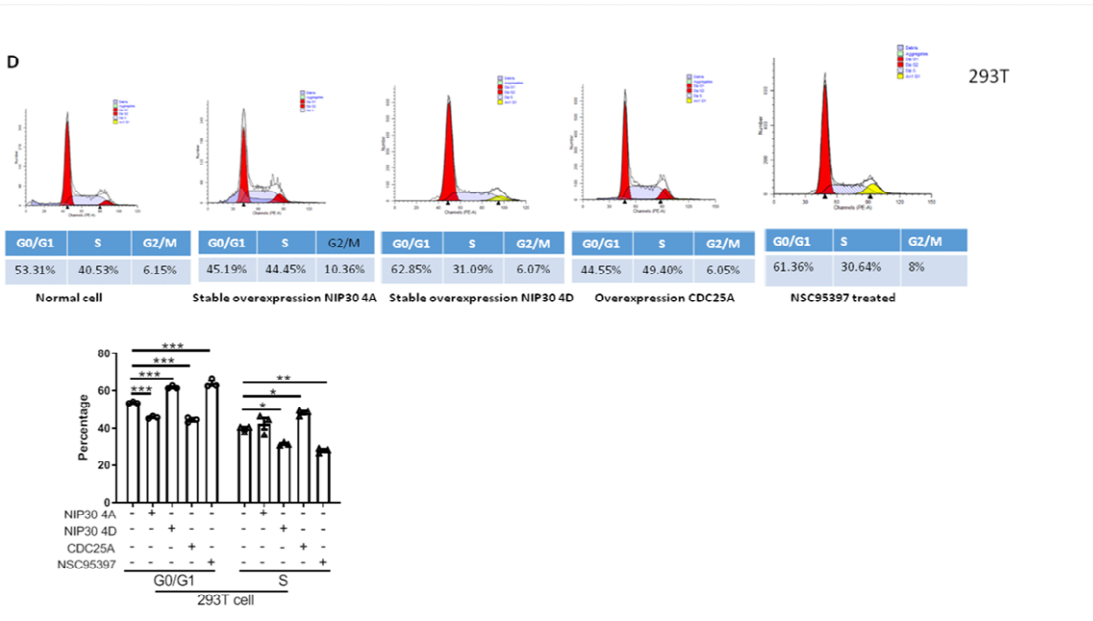

169

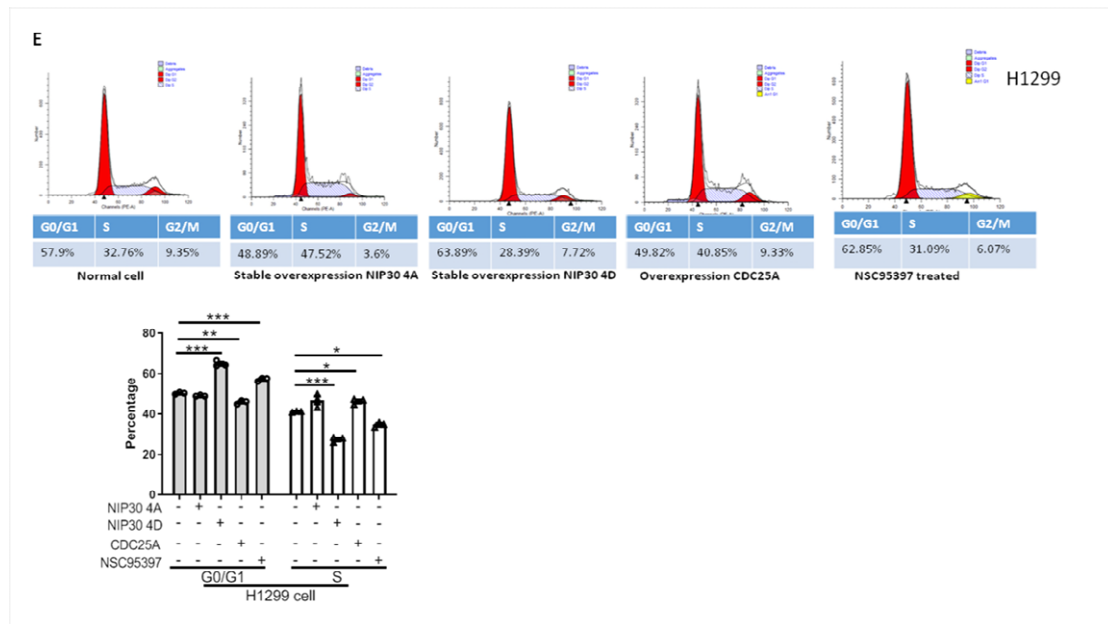

170

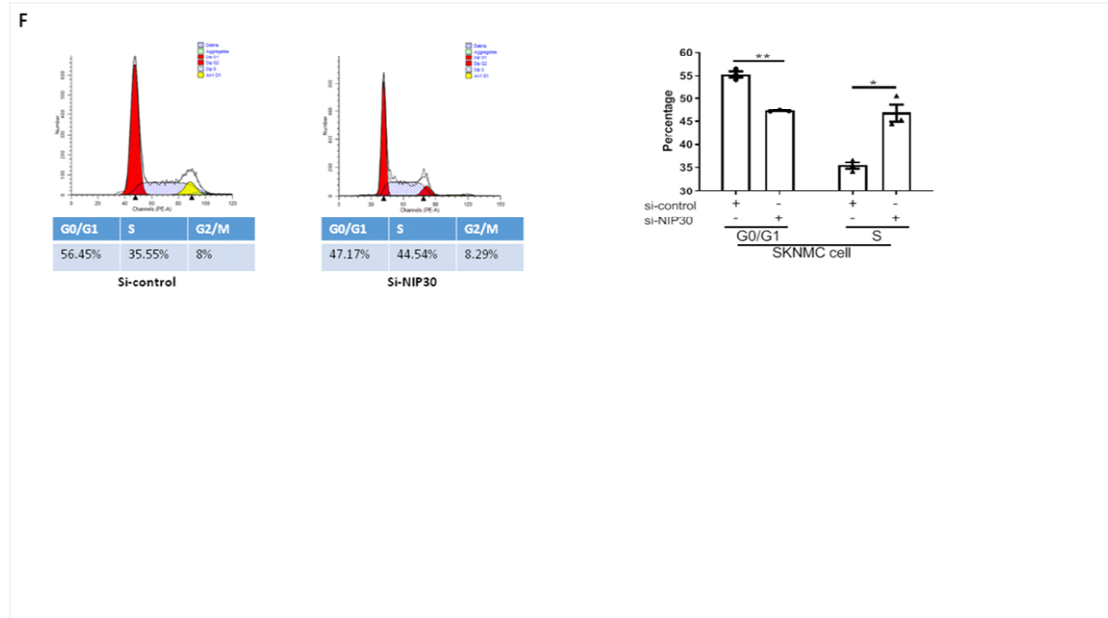

171

172 **Supplementary Figure 6. CDC25A-NIP30-REGγ pathway activated in cell**  
 173 **cycle from G0/G1 to S phase.** (A) REGγ WT and knock out 293T cells were  
 174 stained with PI and analyzed by flow cytometry analysis to enure synchronized  
 175 to G0/G1, S, G2/M phase. (B) H1299 REGγ shN and shR cells were stained  
 176 with PI and analyzed by flow cytometry analysis to make sure synchronized to  
 177 G0/G1, S, G2/M phase. (C) Synchronized H1299 REGγ shN and shR cells to  
 178 G0/G1, S, G2/M phase, followed by Western blot analysis using indicated  
 179 antibodies. Data represent mean ± SEM from three independent experiments.  
 180 (D) DNA content was analyzed by flow cytometry analysis in Normal, stable

181 NIP30 4A/4D overexpressed, CDC25A overexpressed and NSC95397 treated  
 182 293T cells. Data represented mean ± SEM (n=3, one-way Anova). \*, p<0.05; \*\*,  
 183 p<0.01; \*\*\*, p<0.001. P(lane1, lane2)=2.6E-4, P(lane1, lane3)=1.6E-4,  
 184 P(lane1, lane4)=6.3E-5, P(lane1, lane5)=2E-5, P(lane6, lane8)=0.032, P(lane6,  
 185 lane9)=0.027, P(lane6, lane10)=0.003. (E) DNA content was analyzed by flow  
 186 cytometry analysis in KO Normal, stable NIP30 4A/4D overexpressed, CDC25A  
 187 overexpressed and NSC95397 treated H1299 cells. Data represented mean ±  
 188 SEM (n=3, one-way Anova). \*, p<0.05; \*\*, p<0.01; \*\*\*, p<0.001. P(lane1, lane3)  
 189 =2.1E-8, P(lane1, lane4) =1.6E-3, P(lane1, lane5) =2.5E-5, P(lane6, lane8)  
 190 =3.3E-5, P(lane6, lane9) =0.046, P(lane6, lane10) =0.015. (F) DNA content  
 191 was analyzed by flow cytometry analysis in SKNMC cells treated with  
 192 si-Control or siRNA. Data represented mean ± SEM (n=3, two-tailed t-test). \*,  
 193 p<0.05; \*\*, p<0.01. P(lane1, lane2) =4.1E-3, P(lane3, lane4) =0.048.

194  
 195  
 196

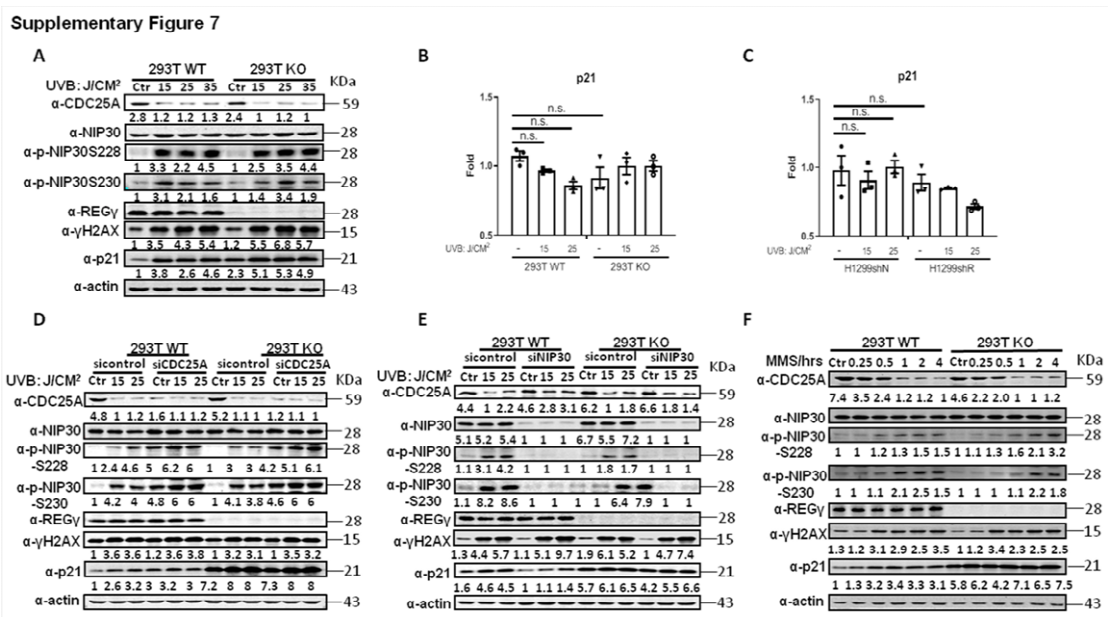

197

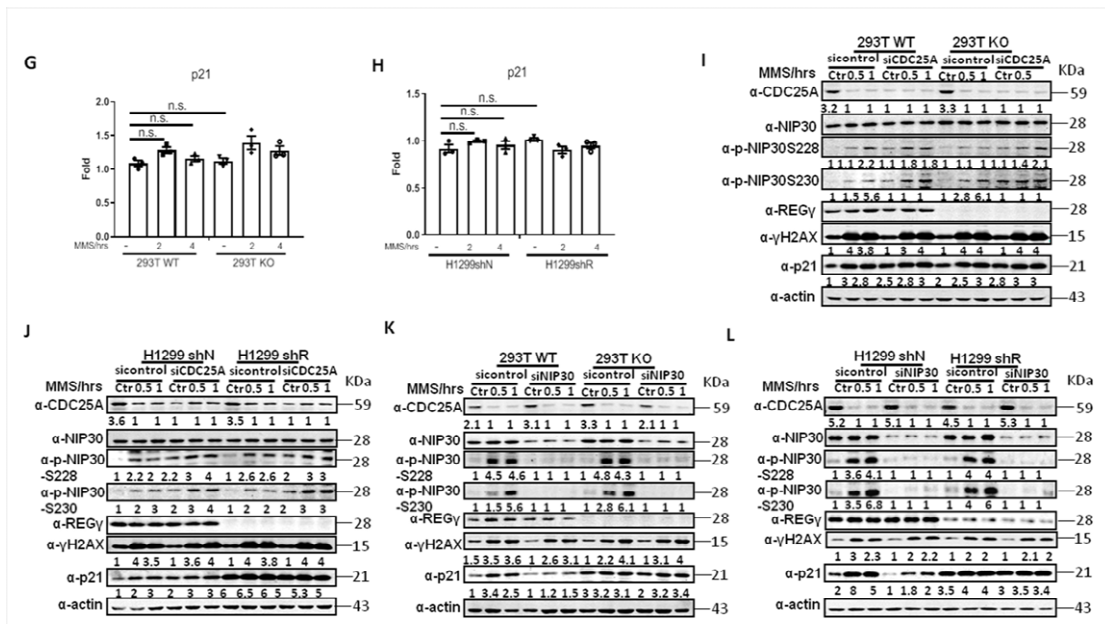

198

199 **Supplementary Figure 7. The action of the CDC25A-NIP30-REGγ pathway**  
 200 **following DNA Damage.** (A) REGγ WT and knock out 293T cells were treated  
 201 with 0, 15 J/cm<sup>2</sup>, 25 J/cm<sup>2</sup> or 35 J/cm<sup>2</sup> UV irradiation and harvested 12hrs later.  
 202 Cell lysates were immunoprecipitated with indicated antibodies. Data  
 203 represent mean ± SEM from three independent experiments. (B) REGγ WT  
 204 and knock out 293T cells were treated with 0, 15 J/cm<sup>2</sup>, 25 J/cm<sup>2</sup> UV irradiation  
 205 and harvested 12hrs later. The real time PCR assay was performed to analyze  
 206 p21 gene expression; n=3, each group. Values are presented as the means ± SEM.  
 207 n.s.=no significance (one-way Anova) (C) H1299 REGγ shN  
 208 and shR cells were treated with 0, 15 J/cm<sup>2</sup>, 25 J/cm<sup>2</sup> UV irradiation and  
 209 harvested 12hrs later. The real time PCR assay was performed to analyze p21  
 210 gene expression; n=3, each group. Values are presented as the means ± SEM.  
 211 n.s.=no significance (one-way Anova) (D) REGγ WT and knock out 293T  
 212 cells were transiently transfected with siCDC25A/Control, then treated with 15  
 213 J/cm<sup>2</sup>, 25 J/cm<sup>2</sup> UV irradiation and harvested for 12hrs. Cell lysates were  
 214 subjected to Western blot using indicated antibodies. Data represent mean ±  
 215 SEM from three independent experiments. (E) REGγ WT and knock out 293T  
 216 cells were transiently transfected with siNIP30/Control, then treated with 15  
 217 J/cm<sup>2</sup>, 25 J/cm<sup>2</sup> UV irradiation and harvested for 12hrs. Cell lysates were

218 immunoprecipitated with indicated antibodies. Data represent mean  $\pm$  SEM  
219 from three independent experiments. (F) REG $\gamma$  WT and knock out 293T cells  
220 were treated with 0.2mM MMS for different time. The levels of CDC25A, total  
221 NIP30, NIP30<sup>Ser228p</sup>, NIP30<sup>Ser230p</sup>, p21, REG $\gamma$  and  $\gamma$ H2AX were determined by  
222 immunoblotting. Actin was used as a loading control. Data represent mean  $\pm$   
223 SEM from three independent experiments. (G) REG $\gamma$  WT and knock out 293T  
224 cells were treated with 0.2mM MMS for different time and real time PCR assay  
225 was performed to analysis p21 gene expression; n=3, each group. Values are  
226 presented as the means  $\pm$  SEM. n.s.=no significance (one-way Anova) (H)  
227 H1299 REG $\gamma$  shN and shR cells were treated with 0.2mM MMS for different  
228 time and real time PCR assay was performed to analysis p21 gene expression;  
229 n=3, each group. Values are presented as the means  $\pm$  SEM. n.s.=no  
230 significance (one-way Anova) (I) REG $\gamma$  WT and knock out 293T cells that  
231 knock down CDC25A by siRNA were treated with 0.2mM MMS for 0.5 hr or 1hr.  
232 Cell lysates were subjected to Western blot using indicated antibodies. Data  
233 represent mean  $\pm$  SEM from three independent experiments. (J) H1299 REG $\gamma$   
234 shN and shR cells were transiently transfected with siCDC25A/Control, and  
235 then cells were treated with 0.2mM MMS for 0.5 hr or 1hr. Cell lysates were  
236 subjected to Western blot using indicated antibodies in three independent  
237 experiments. Data represent mean  $\pm$  SEM. (K) REG $\gamma$  WT and knock out 293T  
238 cells that knock down NIP30 by siRNA were treated with 0.2mM MMS for 0.5  
239 hr or 1hr. Cell lysates were subjected to Western blot using indicated  
240 antibodies. Data represent mean  $\pm$  SEM from three independent experiments.  
241 (L) H1299 REG $\gamma$  shN and shR cells cells were transiently transfected with  
242 siNIP30/Control and then cells were treated with 0.2mM MMS for 0.5 hr or 1hr.  
243 Cell lysates were subjected to Western blot using indicated antibodies. Data  
244 represent mean  $\pm$  SEM from three independent experiments.

245

246



247

Supplementary Figure 8

A

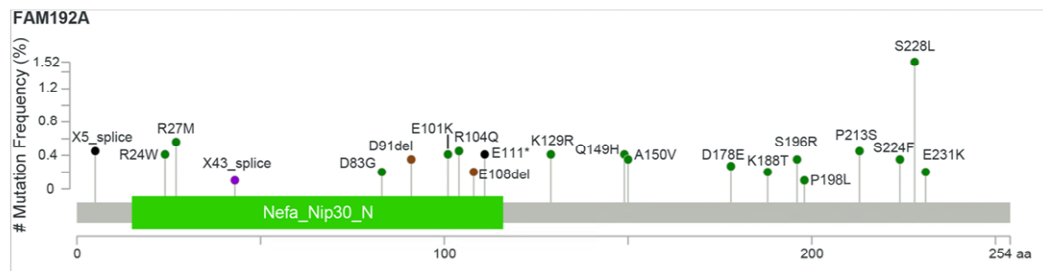

248

249 **Supplementary Figure 8. GCTA analysis of NIP30. (A) Distribution of point**  
 250 **mutations in the NIP30 gene.**

251

Supplementary Table 1 NIP30 mutation analysis from TCGA database

| Study                                                     | Protein Change | Mutation Type     | Chromosome | Start Pos | End Pos  | Ref | Var | Mut cases | All samples | Mutant frequency |
|-----------------------------------------------------------|----------------|-------------------|------------|-----------|----------|-----|-----|-----------|-------------|------------------|
| Kidney Chromophobe (TCGA, Provisional)                    | S228L          | Missense_Mutation | 16         | 57188284  | 57188284 | G   | A   | 1         | 66          | 1.515%           |
| Lung Squamous Cell Carcinoma (TCGA, Provisional)          | R27M           | Missense_Mutation | 16         | 57207687  | 57207687 | C   | A   | 1         | 178         | 0.562%           |
| Colorectal Adenocarcinoma (TCGA, Provisional)             | P213S          | Missense_Mutation | 16         | 57188330  | 57188330 | G   | A   | 1         | 220         | 0.455%           |
| Colorectal Adenocarcinoma (TCGA, Provisional)             | R104Q          | Missense_Mutation | 16         | 57206200  | 57206200 | C   | T   | 1         | 220         | 0.455%           |
| Kidney Renal Clear Cell Carcinoma (TCGA, Provisional)     | X5_splice      | Splice_Site       | 16         | 57207783  | 57207783 | T   | A   | 2         | 448         | 0.446%           |
| Uterine Corpus Endometrial Carcinoma (TCGA, Provisional)  | E111*          | Nonsense_Mutation | 16         | 57206180  | 57206180 | C   | A   | 1         | 242         | 0.413%           |
| Uterine Corpus Endometrial Carcinoma (TCGA, Provisional)  | E101K          | Missense_Mutation | 16         | 57206210  | 57206210 | C   | T   | 1         | 242         | 0.413%           |
| Uterine Corpus Endometrial Carcinoma (TCGA, Provisional)  | R24W           | Missense_Mutation | 16         | 57207697  | 57207697 | G   | A   | 1         | 242         | 0.413%           |
| Uterine Corpus Endometrial Carcinoma (TCGA, Provisional)  | Q149H          | Missense_Mutation | 16         | 57201040  | 57201040 | C   | A   | 1         | 242         | 0.413%           |
| Uterine Corpus Endometrial Carcinoma (TCGA, Provisional)  | K129R          | Missense_Mutation | 16         | 57201101  | 57201101 | T   | C   | 1         | 242         | 0.413%           |
| Skin Cutaneous Melanoma (TCGA, Provisional)               | S224F          | Missense_Mutation | 16         | 57188296  | 57188296 | G   | A   | 1         | 287         | 0.348%           |
| Skin Cutaneous Melanoma (TCGA, Provisional)               | D91del         | in_Frame_Del      | 16         | 57206236  | 57206236 | TCA | -   | 1         | 287         | 0.348%           |
| Stomach Adenocarcinoma (TCGA, Provisional)                | S196R          | Missense_Mutation | 16         | 57188381  | 57188381 | T   | G   | 1         | 287         | 0.348%           |
| Stomach Adenocarcinoma (TCGA, Provisional)                | A150V          | Missense_Mutation | 16         | 57201038  | 57201038 | G   | A   | 1         | 287         | 0.348%           |
| Liver Hepatocellular Carcinoma (TCGA, Provisional)        | D178E          | Missense_Mutation | 16         | 57197926  | 57197926 | A   | T   | 1         | 366         | 0.273%           |
| Prostate Adenocarcinoma (TCGA, Provisional)               | D83G           | Missense_Mutation | 16         | 57206263  | 57206263 | T   | C   | 1         | 492         | 0.203%           |
| Head and Neck Squamous Cell Carcinoma (TCGA, Provisional) | K188T          | Missense_Mutation | 16         | 57188404  | 57188404 | T   | G   | 1         | 504         | 0.198%           |
| Head and Neck Squamous Cell Carcinoma (TCGA, Provisional) | E108del        | In_Frame_Del      | 16         | 57206187  | 57206189 | TTC | -   | 1         | 504         | 0.198%           |
| Head and Neck Squamous Cell Carcinoma (TCGA, Provisional) | E231K          | Missense_Mutation | 16         | 57188276  | 57188276 | C   | T   | 1         | 504         | 0.198%           |
| Breast Invasive Carcinoma (TCGA, Provisional)             | P198L          | Missense_Mutation | 16         | 57188374  | 57188374 | G   | A   | 1         | 963         | 0.104%           |
| Breast Invasive Carcinoma (TCGA, Provisional)             | X43_splice     | Splice_Region     | 16         | 57206793  | 57206793 | G   | A   | 1         | 963         | 0.104%           |

252

253

254

Supplementary Table 2 NIP30 deletion analysis from TCGA database

|                                                                                      | Deletion cases | All cases | Frequency |
|--------------------------------------------------------------------------------------|----------------|-----------|-----------|
| Bladder Urothelial Carcinoma (TCGA, Provisional)                                     | 13             | 408       | 3.19%     |
| Prostate Adenocarcinoma (TCGA, Provisional)                                          | 14             | 492       | 2.85%     |
| Lymphoid Neoplasm Diffuse Large B-cell Lymphoma (TCGA, Provisional)                  | 1              | 48        | 2.08%     |
| Uveal Melanoma (TCGA, Provisional)                                                   | 1              | 80        | 1.25%     |
| Skin Cutaneous Melanoma (TCGA, Provisional)                                          | 3              | 367       | 0.82%     |
| Thymoma (TCGA, Provisional)                                                          | 1              | 123       | 0.81%     |
| Stomach Adenocarcinoma (TCGA, Provisional)                                           | 3              | 441       | 0.68%     |
| Esophageal Carcinoma (TCGA, Provisional)                                             | 1              | 184       | 0.54%     |
| Acute Myeloid Leukemia (TCGA, Provisional)                                           | 1              | 191       | 0.52%     |
| Sarcoma (TCGA, Provisional)                                                          | 1              | 257       | 0.39%     |
| Cervical Squamous Cell Carcinoma and Endocervical Adenocarcinoma (TCGA, Provisional) | 1              | 295       | 0.34%     |
| Liver Hepatocellular Carcinoma (TCGA, Provisional)                                   | 1              | 370       | 0.27%     |
| Lung Adenocarcinoma (TCGA, Provisional)                                              | 1              | 516       | 0.19%     |
| Head and Neck Squamous Cell Carcinoma (TCGA, Provisional)                            | 1              | 522       | 0.19%     |
| Uterine Corpus Endometrial Carcinoma (TCGA, Provisional)                             | 1              | 539       | 0.19%     |
| Glioblastoma Multiforme (TCGA, Provisional)                                          | 1              | 577       | 0.17%     |
| Ovarian Serous Cystadenocarcinoma (TCGA, Provisional)                                | 1              | 579       | 0.17%     |
| Breast Invasive Carcinoma (TCGA, Provisional)                                        | 1              | 1080      | 0.09%     |

255

256

Supplementary Table 3 Phosphorylated at S228

| b-H <sub>3</sub> PO <sub>4</sub> | b         |    |            | y  | y <sup>2</sup> | γ-H <sub>3</sub> PO <sub>4</sub> | γ-H <sub>3</sub> PO <sub>4</sub> <sup>2</sup> |
|----------------------------------|-----------|----|------------|----|----------------|----------------------------------|-----------------------------------------------|
| ---                              | ---       | 1  | S          | 21 | ---            | ---                              | ---                                           |
| ---                              | 145.0608  | 2  | G          | 20 | 1995.7663      | 998.3868                         | 1897.7894                                     |
| ---                              | 232.0928  | 3  | S          | 19 | 1938.7448      | 969.876                          | 1840.7679                                     |
| ---                              | 319.1248  | 4  | S          | 18 | 1851.7128      | 926.36                           | 1753.7359                                     |
| ---                              | 434.1518  | 5  | D          | 17 | 1764.6807      | 882.844                          | 1666.7038                                     |
| ---                              | 521.1838  | 6  | S          | 16 | 1649.6538      | 825.3305                         | 1551.6769                                     |
| ---                              | 650.2264  | 7  | E          | 15 | 1562.6218      | 781.8145                         | 1464.645                                      |
| ---                              | 737.2584  | 8  | S          | 14 | 1433.579       | 717.2932                         | 1335.602                                      |
| ---                              | 824.2904  | 9  | S          | 13 | 1346.547       | 673.7772                         | 1248.57                                       |
| 893.3119                         | 991.2888  | 10 | S(Phospho) | 12 | 1259.515       | 630.2612                         | 1161.538                                      |
| 1008.339                         | 1106.316  | 11 | D          | 11 | 1092.517       | 546.762                          | ---                                           |
| 1095.371                         | 1193.348  | 12 | S          | 10 | 977.4898       | 489.2485                         | ---                                           |
| 1224.414                         | 1322.39   | 13 | E          | 9  | 890.4578       | 445.7325                         | ---                                           |
| 1281.435                         | 1379.412  | 14 | G          | 8  | 761.4152       | 381.2112                         | ---                                           |
| 1382.483                         | 1480.46   | 15 | T          | 7  | 704.3937       | 352.7005                         | ---                                           |
| 1495.567                         | 1593.5436 | 16 | I          | 6  | 603.3461       | 302.1767                         | ---                                           |
| 1609.6096                        | 1707.5865 | 17 | N          | 5  | 490.262        | 245.6346                         | ---                                           |
| 1680.6467                        | 1778.6236 | 18 | A          | 4  | 376.2191       | 188.6132                         | ---                                           |
| 1781.6944                        | 1879.6713 | 19 | T          | 3  | 305.1819       | 153.0946                         | ---                                           |
| 1838.7159                        | 1936.6928 | 20 | G          | 2  | 204.1343       | 102.5708                         | ---                                           |
| ---                              | ---       | 21 | K          | 1  | 147.1128       | 74.06                            | ---                                           |

257

258

Supplementary Table 4 Phosphorylated at S230

| $\beta$ -H <sub>3</sub> PO <sub>4</sub> | b         |    |            |    | $\gamma$  | $\gamma^2$ | $\gamma$ -H <sub>3</sub> PO <sub>4</sub> | $\gamma$ -H <sub>3</sub> PO <sub>4</sub> <sup>+2</sup> |
|-----------------------------------------|-----------|----|------------|----|-----------|------------|------------------------------------------|--------------------------------------------------------|
| ---                                     | ---       | 1  | S          | 21 | ---       | ---        | ---                                      | ---                                                    |
| ---                                     | 145.0608  | 2  | G          | 20 | 1995.7663 | 998.3868   | 1897.7894                                | 949.3983                                               |
| ---                                     | 232.0928  | 3  | S          | 19 | 1938.7448 | 969.876    | 1840.7679                                | 920.8876                                               |
| ---                                     | 319.1248  | 4  | S          | 18 | 1851.7128 | 926.36     | 1753.7359                                | 877.3716                                               |
| ---                                     | 434.1518  | 5  | D          | 17 | 1764.6807 | 882.844    | 1666.7038                                | 833.8556                                               |
| ---                                     | 521.1838  | 6  | S          | 16 | 1649.6538 | 825.3305   | 1551.6769                                | 776.3421                                               |
| ---                                     | 650.2264  | 7  | E          | 15 | 1562.6218 | 781.8145   | 1464.6449                                | 732.8261                                               |
| ---                                     | 737.2584  | 8  | S          | 14 | 1433.5792 | 717.2932   | 1335.602                                 | 668.3048                                               |
| ---                                     | 824.2904  | 9  | S          | 13 | 1346.5471 | 673.7772   | 1248.57                                  | 624.7888                                               |
| ---                                     | 911.3225  | 10 | S          | 12 | 1259.515  | 630.2612   | 1161.538                                 | 581.2727                                               |
| ---                                     | 1026.349  | 11 | D          | 11 | 1172.483  | 586.7452   | 1074.506                                 | 537.7567                                               |
| 1095.371                                | 1193.348  | 12 | S(Phospho) | 10 | 1057.456  | 529.2317   | 959.4793                                 | 480.2433                                               |
| 1224.414                                | 1322.39   | 13 | E          | 9  | 890.4578  | 445.7325   | ---                                      | ---                                                    |
| 1281.435                                | 1379.4118 | 14 | G          | 8  | 761.4152  | 381.2112   | ---                                      | ---                                                    |
| 1382.4826                               | 1480.4595 | 15 | T          | 7  | 704.3937  | 352.7005   | ---                                      | ---                                                    |
| 1495.5667                               | 1593.5436 | 16 | I          | 6  | 603.3461  | 302.1767   | ---                                      | ---                                                    |
| 1609.6096                               | 1707.5865 | 17 | N          | 5  | 490.262   | 245.6346   | ---                                      | ---                                                    |
| 1680.6467                               | 1778.6236 | 18 | A          | 4  | 376.2191  | 188.6132   | ---                                      | ---                                                    |
| 1781.6944                               | 1879.6713 | 19 | T          | 3  | 305.1819  | 153.0946   | ---                                      | ---                                                    |
| 1838.7159                               | 1936.6928 | 20 | G          | 2  | 204.1343  | 102.5708   | ---                                      | ---                                                    |
| ---                                     | ---       | 21 | K          | 1  | 147.1128  | 74.06      | ---                                      | ---                                                    |

259

260

261

262
